# Supplementary material for: Key Gene and Functional Pathways Identified in Unexplained Recurrent Spontaneous Abortion Using Targeted RNA Sequencing and Clinical Analysis
Source: Front Immunol. 2021 Aug 5;12:717832. doi: 10.3389/fimmu.2021.717832 (PMC8375436; doi:10.3389/fimmu.2021.717832)
Supplement: Supplementary file 1 [file Table_1.xlsx]

## Sheet: Target Gene List
transcript_id	gene_id	gene_symbol
ENST00000322910.9	ENSG00000072778.20	ACADVL
ENST00000575842.5	ENSG00000184009.12	ACTG1
ENST00000570019.1	ENSG00000259904.1	ACTG1P15
ENST00000418987.2	ENSG00000237999.2	ACTG1P19
ENST00000425123.1	ENSG00000236085.1	ACTG1P4
ENST00000464097.5	ENSG00000196839.13	ADA
ENST00000368977.9	ENSG00000135537.17	AFG1L
ENST00000466820.1	ENSG00000204472.13	AIF1
ENST00000025301.4	ENSG00000023516.9	AKAP11
ENST00000394518.6	ENSG00000170776.21	AKAP13
ENST00000603312.1	ENSG00000196139.14	AKR1C3
ENST00000505539.1	ENSG00000213406.3	ANXA2P1
ENST00000379454.9	ENSG00000198363.18	ASPH
ENST00000648006.2	ENSG00000166710.20	B2M
ENST00000504592.5	ENSG00000153064.12	BANK1
ENST00000293288.12	ENSG00000087088.20	BAX
ENST00000333681.5	ENSG00000171791.13	BCL2
ENST00000670167.1	ENSG00000257859.2	CASC18
ENST00000621385.1	ENSG00000157456.8	CCNB2
ENST00000302014.11	ENSG00000170458.14	CD14
ENST00000374213.3	ENSG00000169442.9	CD52
ENST00000367064.8	ENSG00000196352.15	CD55
ENST00000538418.1	ENSG00000010278.14	CD9
ENST00000478882.1	ENSG00000117399.14	CDC20
ENST00000257904.11	ENSG00000135446.17	CDK4
ENST00000244336.10	ENSG00000124469.12	CEACAM8
ENST00000544944.6	ENSG00000104859.15	CLASRP
ENST00000584581.5	ENSG00000133313.15	CNDP2
ENST00000647693.1	ENSG00000122218.16	COPA
ENST00000309035.11	ENSG00000175029.17	CTBP2
ENST00000585629.1	ENSG00000267153.1	CTBP2P3
ENST00000513884.1	ENSG00000251102.1	CTBP2P4
ENST00000593270.1	ENSG00000267091.1	CTBP2P7
ENST00000422584.1	ENSG00000234383.1	CTBP2P8
ENST00000559175.1	ENSG00000137770.14	CTDSPL2
ENST00000483500.1	ENSG00000169429.11	CXCL8
ENST00000466402.1	ENSG00000198876.13	DCAF12
ENST00000583038.5	ENSG00000141736.13	ERBB2
ENST00000577894.1	ENSG00000185862.7	EVI2B
ENST00000435729.1	ENSG00000213201.3	FABP5P10
ENST00000439042.1	ENSG00000236044.1	FABP5P2
ENST00000474894.1	ENSG00000221829.9	FANCG
ENST00000652046.1	ENSG00000026103.22	FAS
ENST00000367969.8	ENSG00000203747.11	FCGR3A
ENST00000533780.1	ENSG00000162747.11	FCGR3B
ENST00000371806.4	ENSG00000085265.11	FCN1
ENST00000439640.4	ENSG00000088832.17	FKBP1A
ENST00000376207.9	ENSG00000049768.15	FOXP3
ENST00000444823.1	ENSG00000235595.1	GAPDHP23
ENST00000507324.1	ENSG00000248415.1	GAPDHP61
ENST00000425487.2	ENSG00000235587.2	GAPDHP65
ENST00000481242.5	ENSG00000136895.19	GARNL3
ENST00000480725.1	ENSG00000188828.11	GLRA4
ENST00000299314.12	ENSG00000111670.16	GNPTAB
ENST00000519574.2	ENSG00000179921.15	GPBAR1
ENST00000529102.1	ENSG00000119714.11	GPR68
ENST00000435822.5	ENSG00000138867.16	GUCD1
ENST00000461622.1	ENSG00000169919.17	GUSB
ENST00000487791.1	ENSG00000206172.8	HBA1
ENST00000482565.1	ENSG00000188536.13	HBA2
ENST00000475226.1	ENSG00000244734.4	HBB
ENST00000367837.10	ENSG00000112339.15	HBS1L
ENST00000477541.1	ENSG00000204257.15	HLA-DMA
ENST00000498020.1	ENSG00000242574.9	HLA-DMB
ENST00000467465.1	ENSG00000204252.14	HLA-DOA
ENST00000469120.1	ENSG00000223865.11	HLA-DPB1
ENST00000462777.1	ENSG00000204642.14	HLA-F
ENST00000539045.1	ENSG00000256269.10	HMBS
ENST00000473395.1	ENSG00000115541.11	HSPE1
ENST00000561489.3	ENSG00000261395.3	HSPE1P5
ENST00000160262.10	ENSG00000076662.10	ICAM3
ENST00000229135.4	ENSG00000111537.5	IFNG
ENST00000505351.1	ENSG00000164136.17	IL15
ENST00000317757.7	ENSG00000196083.10	IL1RAP
ENST00000311734.6	ENSG00000115602.17	IL1RL1
ENST00000228534.6	ENSG00000110944.9	IL23A
ENST00000379959.7	ENSG00000134460.17	IL2RA
ENST00000276110.6	ENSG00000147168.12	IL2RG
ENST00000525377.6	ENSG00000008517.16	IL32
ENST00000245414.9	ENSG00000125347.14	IRF1
ENST00000546338.2	ENSG00000172183.15	ISG20
ENST00000268296.8	ENSG00000140678.16	ITGAX
ENST00000434584.2	ENSG00000078596.11	ITM2A
ENST00000381340.8	ENSG00000123104.12	ITPR2
ENST00000288135.5	ENSG00000157404.15	KIT
ENST00000537017.1	ENSG00000205809.9	KLRC2
ENST00000617889.5	ENSG00000150045.12	KLRF1
ENST00000556263.1	ENSG00000131981.16	LGALS3
ENST00000356922.5	ENSG00000174405.13	LIG4
ENST00000517675.1	ENSG00000253230.9	LINC00599
ENST00000667326.1	ENSG00000251432.7	LINC02615
ENST00000303127.12	ENSG00000169223.15	LMAN2
ENST00000530990.1	ENSG00000168056.16	LTBP3
ENST00000415385.7	ENSG00000065559.15	MAP2K4
ENST00000215832.10	ENSG00000100030.14	MAPK1
ENST00000464244.1	ENSG00000100294.13	MCAT
ENST00000357742.9	ENSG00000140563.15	MCTP2
ENST00000530021.5	ENSG00000133816.15	MICAL2
ENST00000436965.5	ENSG00000115648.14	MLPH
ENST00000375810.8	ENSG00000204420.10	MPIG6B
ENST00000361624.2	ENSG00000198804.2	MT-CO1
ENST00000362079.2	ENSG00000198938.2	MT-CO3
ENST00000361390.2	ENSG00000198888.2	MT-ND1
ENST00000361453.3	ENSG00000198763.3	MT-ND2
ENST00000361567.2	ENSG00000198786.2	MT-ND5
ENST00000361681.2	ENSG00000198695.2	MT-ND6
ENST00000387347.2	ENSG00000210082.2	MT-RNR2
ENST00000521764.3	ENSG00000253506.3	NACA2
ENST00000527932.1	ENSG00000132780.17	NASP
ENST00000615285.4	ENSG00000149294.16	NCAM1
ENST00000371564.8	ENSG00000101096.20	NFATC2
ENST00000428099.6	ENSG00000077150.20	NFKB2
ENST00000372652.5	ENSG00000066136.20	NFYC
ENST00000595217.1	ENSG00000105374.10	NKG7
ENST00000264833.8	ENSG00000105088.8	OLFM2
ENST00000558043.5	ENSG00000166803.13	PCLAF
ENST00000482665.1	ENSG00000185615.15	PDIA2
ENST00000296029.4	ENSG00000163737.4	PF4
ENST00000591996.1	ENSG00000087157.19	PGS1
ENST00000283243.13	ENSG00000153246.13	PLA2R1
ENST00000221264.8	ENSG00000011422.12	PLAUR
ENST00000556754.1	ENSG00000198805.11	PNP
ENST00000397487.4	ENSG00000204434.6	POTEKP
ENST00000547889.6	ENSG00000222036.8	POTEM
ENST00000577856.2	ENSG00000263353.3	PPIAL4A
ENST00000585245.2	ENSG00000263464.2	PPIAL4C
ENST00000544708.2	ENSG00000256374.2	PPIAL4D
ENST00000581164.1	ENSG00000271567.1	PPIAL4E
ENST00000581138.3	ENSG00000279782.2	PPIAL4F
ENST00000419275.2	ENSG00000236334.2	PPIAL4G
ENST00000584068.3	ENSG00000270339.3	PPIAL4H
ENST00000434706.1	ENSG00000237882.1	PPIAP13
ENST00000486414.1	ENSG00000228169.3	PPIAP19
ENST00000464473.1	ENSG00000226038.5	PPIAP21
ENST00000358455.4	ENSG00000198618.5	PPIAP22
ENST00000420099.1	ENSG00000214178.3	PPIAP23
ENST00000420177.1	ENSG00000229303.1	PPIAP25
ENST00000414949.2	ENSG00000214975.4	PPIAP29
ENST00000450588.1	ENSG00000235044.1	PPIAP3
ENST00000405422.2	ENSG00000217094.2	PPIAP31
ENST00000441944.2	ENSG00000178654.11	PPIAP33
ENST00000448870.1	ENSG00000230593.3	PPIAP40
ENST00000530952.1	ENSG00000213592.4	PPIAP42
ENST00000527147.1	ENSG00000255059.1	PPIAP43
ENST00000567565.3	ENSG00000260815.3	PPIAP47
ENST00000567149.1	ENSG00000260229.1	PPIAP51
ENST00000596021.1	ENSG00000228674.4	PPIAP59
ENST00000557078.1	ENSG00000258477.1	PPIAP6
ENST00000505144.1	ENSG00000249092.1	PPIAP77
ENST00000452411.1	ENSG00000213455.3	PPIAP82
ENST00000446082.2	ENSG00000223819.2	PPIAP89
ENST00000257836.4	ENSG00000135378.4	PRRG4
ENST00000371953.8	ENSG00000171862.11	PTEN
ENST00000306051.3	ENSG00000168229.4	PTGDR
ENST00000416215.6	ENSG00000111679.17	PTPN6
ENST00000563580.5	ENSG00000103769.10	RAB11A
ENST00000243662.11	ENSG00000123892.12	RAB38
ENST00000519469.1	ENSG00000164754.14	RAD21
ENST00000378823.8	ENSG00000113522.14	RAD50
ENST00000245304.5	ENSG00000125249.7	RAP2A
ENST00000417216.3	ENSG00000225422.4	RBMS1P1
ENST00000367854.8	ENSG00000198771.11	RCSD1
ENST00000285735.6	ENSG00000155366.16	RHOC
ENST00000618786.1	ENSG00000276168.1	RN7SL1
ENST00000490232.3	ENSG00000274012.1	RN7SL2
ENST00000610674.1	ENSG00000278771.1	RN7SL3
ENST00000471086.3	ENSG00000244642.3	RN7SL396P
ENST00000584058.2	ENSG00000263740.2	RN7SL4P
ENST00000581458.2	ENSG00000265735.2	RN7SL5P
ENST00000463779.3	ENSG00000239437.3	RN7SL752P
ENST00000552292.5	ENSG00000089157.16	RPLP0
ENST00000490750.1	ENSG00000243742.5	RPLP0P2
ENST00000261918.9	ENSG00000138623.10	SEMA7A
ENST00000447266.7	ENSG00000112701.18	SENP6
ENST00000493550.1	ENSG00000198574.6	SH2D1B
ENST00000394224.3	ENSG00000213445.10	SIPA1
ENST00000484221.1	ENSG00000026751.17	SLAMF7
ENST00000512374.1	ENSG00000079215.14	SLC1A3
ENST00000622176.4	ENSG00000131389.17	SLC6A6
ENST00000469581.1	ENSG00000115904.12	SOS1
ENST00000371847.8	ENSG00000132122.12	SPATA6
ENST00000267884.11	ENSG00000140319.11	SRP14
ENST00000457498.5	ENSG00000144559.10	TAMM41
ENST00000405852.5	ENSG00000136560.14	TANK
ENST00000308893.9	ENSG00000149930.18	TAOK2
ENST00000354258.4	ENSG00000168394.11	TAP1
ENST00000479770.1	ENSG00000150455.13	TIRAP
ENST00000642700.1	ENSG00000137462.8	TLR2
ENST00000415187.1	ENSG00000230043.1	TMSB4XP6
ENST00000449264.3	ENSG00000232810.4	TNF
ENST00000162749.6	ENSG00000067182.7	TNFRSF1A
ENST00000263932.7	ENSG00000120949.15	TNFRSF8
ENST00000612671.1	ENSG00000183718.5	TRIM52
ENST00000173898.12	ENSG00000067445.21	TRO
ENST00000313511.8	ENSG00000178952.11	TUFM
ENST00000585901.6	ENSG00000011600.11	TYROBP
ENST00000376440.6	ENSG00000134882.16	UBAC2
ENST00000377050.5	ENSG00000213886.4	UBD
ENST00000257548.10	ENSG00000135093.13	USP30
ENST00000398571.7	ENSG00000115464.15	USP34
ENST00000258399.8	ENSG00000135913.11	USP37
ENST00000547951.1	ENSG00000136014.12	USP44
ENST00000376701.4	ENSG00000015285.10	WAS
ENST00000518193.1	ENSG00000253517.1	XRCC6P4
ENST00000395957.6	ENSG00000164924.18	YWHAZ
ENST00000399764.3	ENSG00000215199.3	YWHAZP6
ENST00000436906.1	ENSG00000227261.1	YWHAZP7
ENST00000292928.7	ENSG00000161298.18	ZNF382
ENST00000452305.5	ENSG00000183621.15	ZNF438
ENST00000349618.7	ENSG00000176083.17	ZNF683
ENST00000329630.10	ENSG00000196456.13	ZNF775
ENST00000421553.6	ENSG00000197062.11	ZSCAN26
